# Supplementary material for: The crystal structure of dGTPase reveals the molecular basis of dGTP selectivity
Source: PubMed Central journal article supplement — Proc Natl Acad Sci U S A. 2019 Apr 24;116(19):9333–9. doi: 10.1073/pnas.1814999116 (PMC6511015; doi:10.1073/pnas.1814999116), 2019-04-24
Supplement: pnas.1814999116.sapp.pdf [file pnas.1814999116.sapp.pdf]

## Supplementary Information for

### **The crystal structure of dGTPase reveals the molecular basis of dGTP selectivity**

Christopher O. Barnes<sup>1,2†</sup>, Ying Wu<sup>1†</sup>, Jinhua Song<sup>3</sup>, Guowu Lin<sup>1</sup>, Elizabeth L. Baxter<sup>3</sup>, Aaron S. Brewster<sup>4</sup>, Veeranagu Nagarajan<sup>5</sup>, Andrew Holmes<sup>6</sup>, Michael Soltis<sup>3</sup>, Nicholas K. Sauter<sup>4</sup>, Jinwoo Ahn<sup>1</sup>, Aina E. Cohen<sup>3\*</sup> and Guillermo Calero<sup>1\*</sup>

Co-correspondence should be addressed to Aina E. Cohen and Guillermo Calero  
Emails: [acohen@slac.stanford.edu](mailto:acohen@slac.stanford.edu), [guc9@pitt.edu](mailto:guc9@pitt.edu)

#### **This PDF file includes:**

Supplementary text  
Figs. S1 to S5  
Tables S1 to S4

#### **Supplementary Methods**

---

<sup>1</sup> Department of Structural Biology, University of Pittsburgh School of Medicine, Pittsburgh, PA 15260, USA.

<sup>2</sup> Department of Pharmacology and Chemical Biology, University of Pittsburgh School of Medicine, Pittsburgh, PA 15260, USA

<sup>3</sup> Macromolecular Crystallographic Group, Stanford Synchrotron Radiation Lightsource, National Accelerator Laboratory, Stanford University, Menlo Park, CA 94025, USA.

<sup>4</sup> Molecular Biophysics & Integrated Bioimaging Division, Lawrence Berkeley National Laboratory, Berkeley, CA 94720, USA.

<sup>5</sup> JAN Scientific, Inc, 4726 11th Ave NE, Ste 101, Seattle, WA, 98105, USA.

<sup>6</sup> Swanson School of Engineering, University of Pittsburgh, Pittsburgh, PA 15260, USA.

Additional Footnotes: †These authors contributed equally to this work.

### *Design and Fabrication of Multi-Crystal Holders (MCHs)*

MCHs were developed to meet the following requirements: 1) minimal UV-background, 2) a larger size than commercially available mounts to hold substantial amounts of crystals, and 3) compatibility with the SAM robot system for robotic exchange during the diffraction experiment. Initial MCH prototypes were fabricated at the University of Pittsburgh, Swanson School of Engineering using a commercially available Stereo Lithography Machine, a 3D Systems Viper High Resolution SLA and Somos 11122XC Resin. The pointed end of the diamond shaped MCH was necessary to penetrate a crystal containing drop and mount crystals without drop displacement. Despite the success of the first-generation 3D-printed MCHs, subsequent generations of MCHs were manufactured by micron laser technology (Oregon, USA) from Mylar sheets (McMaster Carr, IL, USA) of 50  $\mu\text{m}$  thickness (Fig. S1A, B). The laser-cut MCHs had better defined reference features (fiducial marks for crystal positioning), and were resilient to the physical manipulation during the crystal loading process. MCHs were affixed using epoxy to the end of a standard Hampton Research base-pin assembly for robotic exchange (Fig. S1B).

### *Macro parameters for detecting crystals on MCHs*

UV microscopy images were loaded into *ImageJ* and brightness/contrast features were adjusted to highlight UV positive regions (Fig. 1B and Figs. S1, S2). Images were subsequently processed using a macro developed in our laboratory. Sample input parameters for our macro are listed below:

```
run("Smooth");
```

```
run("Threshold", "method=Huang ignore_black white setthreshold");  
setThreshold(40, 900);  
setOption("BlackBackground", false);  
run("Erode");  
run("Analyze Particles...", "size=150-10000 circularity=0.25-1.00 show=Outlines  
display summarize in situ");
```

Modifications to brightness threshold, particle size, and circularity are critical to the selection of bright areas that indicate UV-visualized crystals, which are converted into crystal profiles (Fig. S2C) and a list specifying crystal size and centroid position (in x-y jpeg pixel coordinates, see Table S1). The pixel coordinates of the four MCH reference points were identified in relation to the crystal coordinates (Fig. 1B and Fig. S1E, red dots) through examination of a corresponding brightfield image (Figs. S1C and S2A, D). For larger crystals (Fig. S2D-F), a library of masks was created to define spacing along a crystal to translate into unexposed crystal volumes. To utilize this feature, the macro was altered to allow for the overlay of the mask as follows:

```
run("Subtract...", "value=50");  
run("Smooth");  
run("Threshold", "method=Huang ignore_black white setthreshold");  
setThreshold(30, 255);  
setOption("BlackBackground", false);  
run("Make Binary", "thresholded remaining");
```

The resulting image was then overlaid with the mask (Fig. S2E, inset) followed by:

```
run("Make Binary", "thresholded remaining");  
run("Analyze Particles...", "size=40-2000 circularity=0-1.00 show=Outlines  
display summarize record in situ");
```

The minimum size was set to the same size (in pixels) as the mask size and circularity began at 0 since the mask creates square shapes. Coordinates for each distinct beam position were saved with an angular offset for helical data collection.

**Supplementary Figures and Legends**

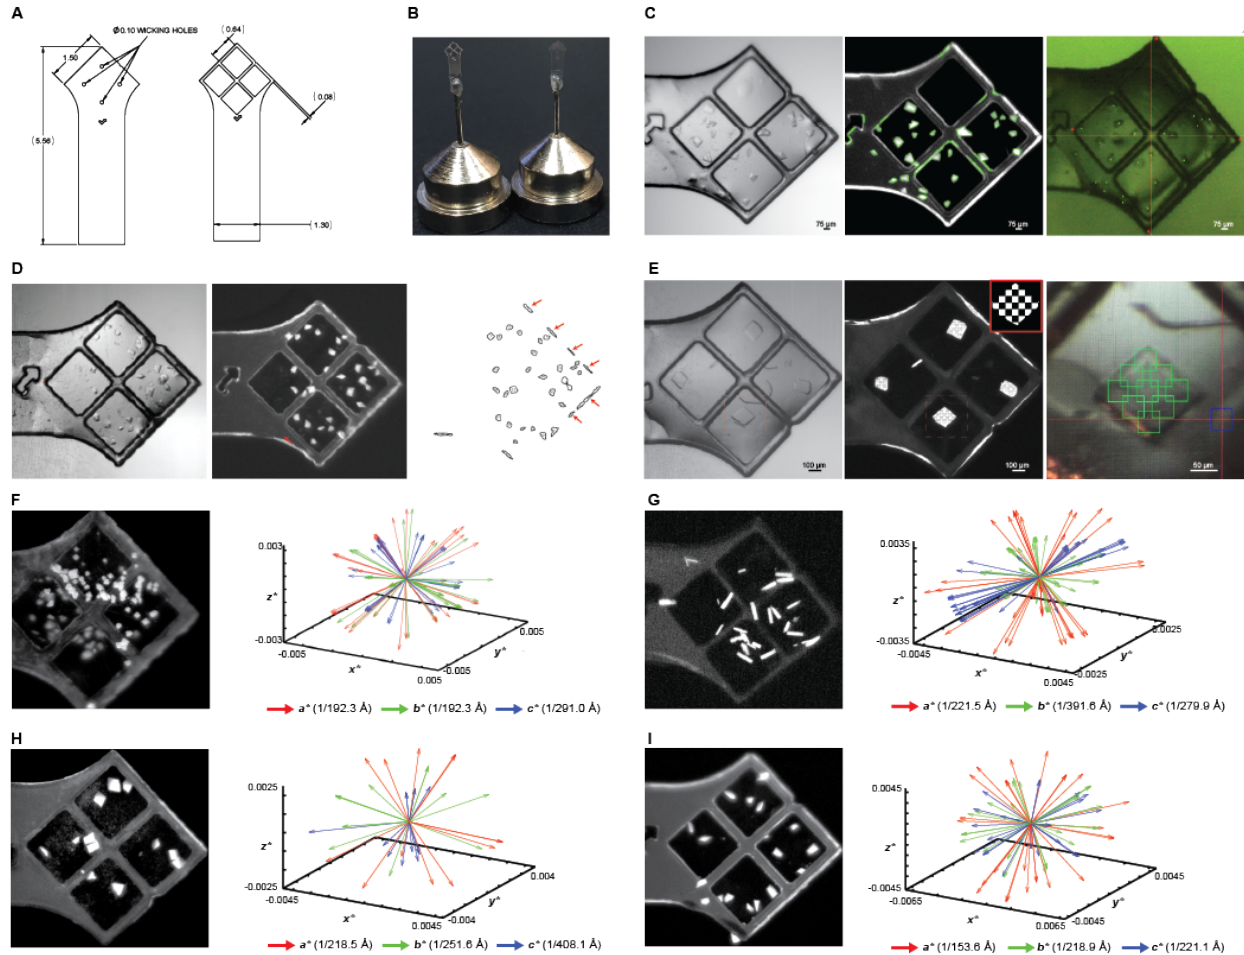

**Figure S1. Design and identification of crystals mounted on Multi Crystal Holders.** **A)** AutoCAD DXF schematic illustrating the dimensions of MCHs for laser printing onto Mylar sheets. **B)** Assembly of MCHs achieved by epoxying laser-printed MCHs onto the pin-base aperture of a Hampton loop. **C)** Left and Middle Panels: Brightfield and UV fluorescence microscopy images of Pol-Spt4/5-DNA mounted crystals. Green outlines indicate the crystal positions determined after particle analysis in ImageJ. Right panel: *BluIce* Image of Pol-Spt4/5 crystals mounted at XPP endstation. Coordinates generated in ImageJ (see Table S1) were uploaded, and after identification of reference fiducial marks (red asterisks) and beam positions were assigned to each crystal (green boxes). **D)** Brightfield image, UV fluorescence image, and

crystal positions as revealed by ImageJ. Coordinates for incorrectly identified UV fluorescence signal on the edge of the MCH (red arrows, right panel) are manually removed from the final coordinate list before data collection. **E)** Large crystals of the Pol II – TFIIB – DNA complex illustrate the multi-shot strategy with user specified spacing along the crystals surface. **F-I)** Reciprocal space representation of the basis vectors of indexed crystals that were singularly exposed for **F)** *Ec*-dGTPase, **G)** RNA Polymerase II T834P variant, **H)** RNA Polymerase II – TFIIB – DNA, and **I)** RNA Polymerase II – Spt4/5 – DNA crystals.

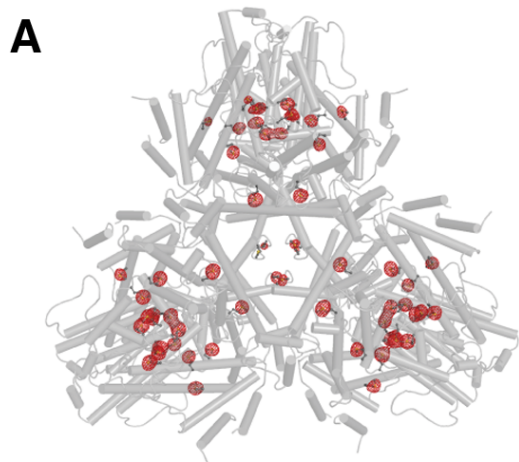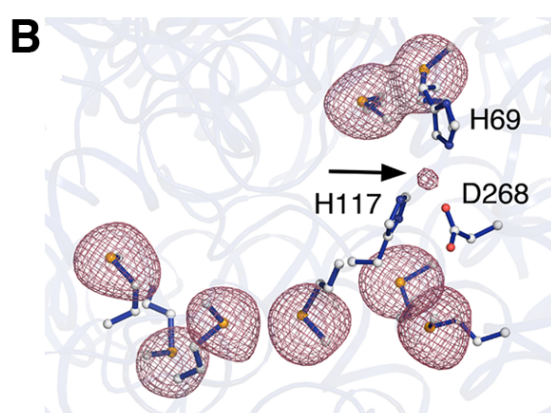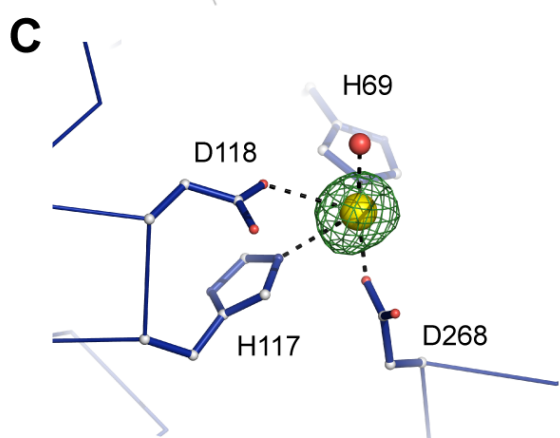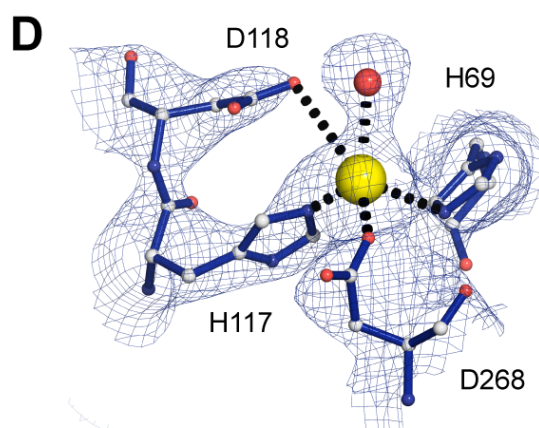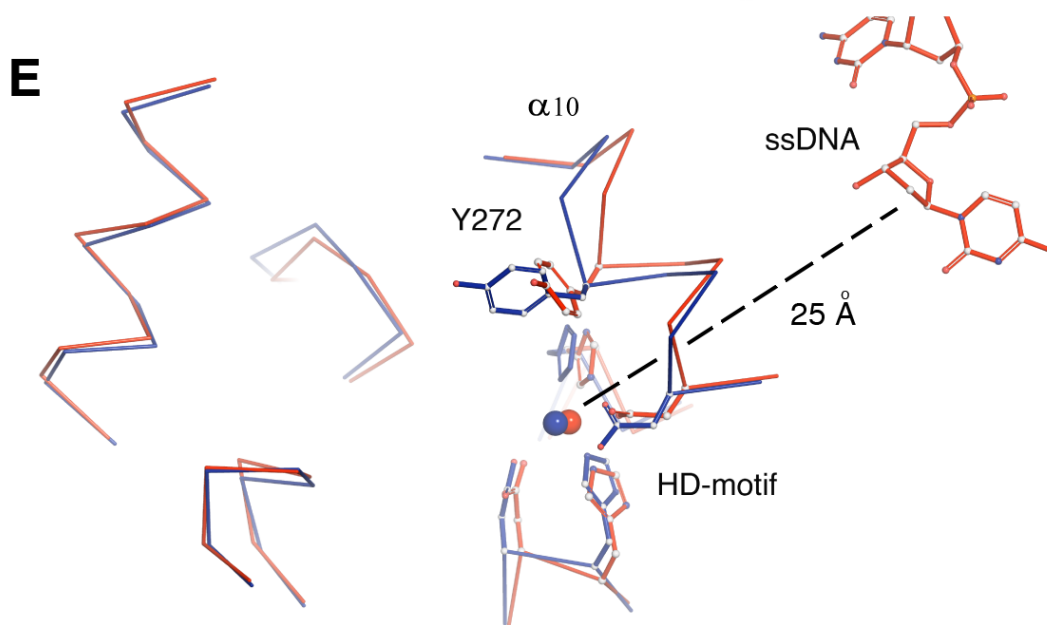

**Figure S2. Se-Met substructure and comparison of active site residues in apo- *Ec*-dGTPase structures.** **A)** Tube representation illustrating the hexameric *Ec*-dGTPase structure determined by experimental phasing from selenium methionine labeled protein. The Se anomalous difference map is shown in red, contoured at  $8\sigma$ . **B)** Anomalous difference map contoured at  $5\sigma$  illustrating the presence of density for  $Mn^{2+}$  (arrow) at the active site. Anomalous density for Se atoms is shown for comparison. **C)** The  $F_o-F_c$  map counteracted at  $6\sigma$  of the apo-XFEL structure calculated after removal of  $Mn^{2+}$  ions from the refined structure (modeled  $Mn^{2+}$  ion shown in yellow). **D)**  $2F_o-F_c$  composite omit map to illustrate electron density for a water molecule which forms part of the coordination sphere of  $Mn^{2+}$ . **E)** Overlay of the *Ec*-dGTPase apo-XFEL (blue) and ssDNA (red, PDB 4X9E) structures illustrating conformational differences mainly in the  $\alpha 10$  helix involving Tyr<sup>272</sup> due to the presence of the ssDNA located 25 Å away from the binding pocket (broken line).



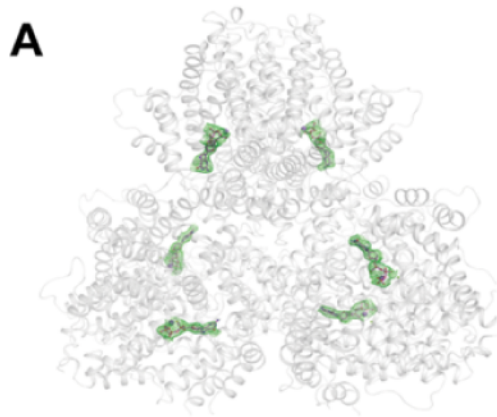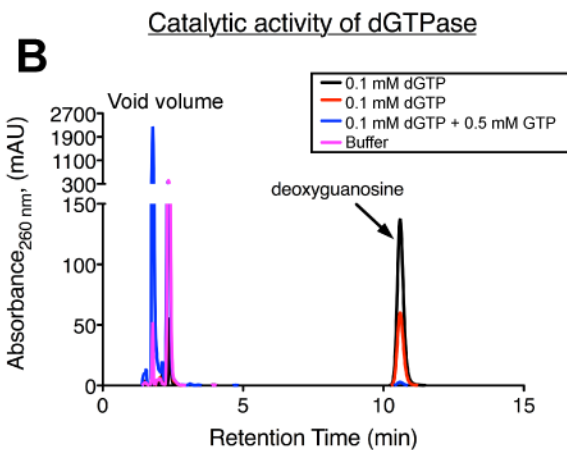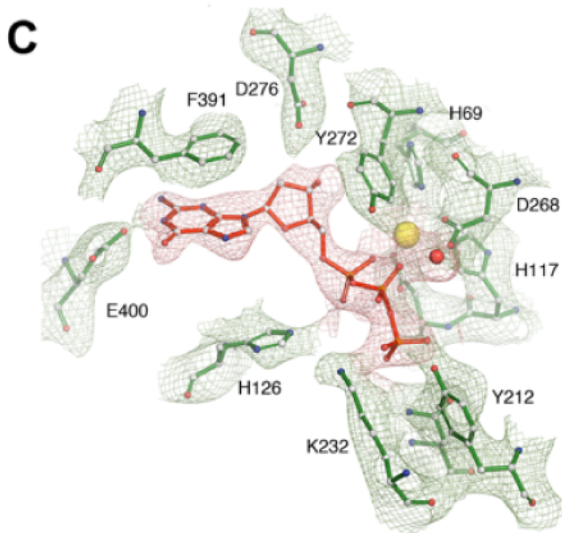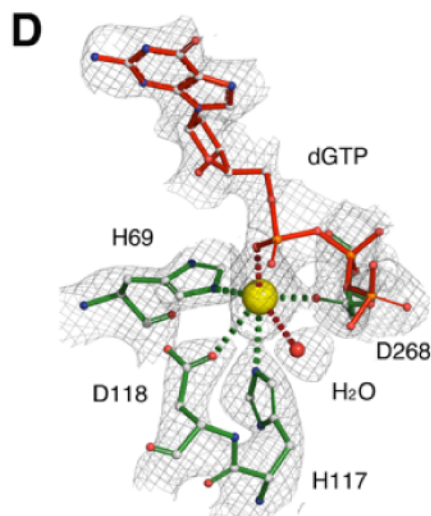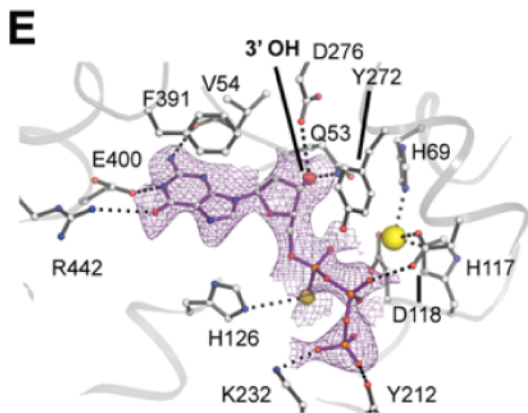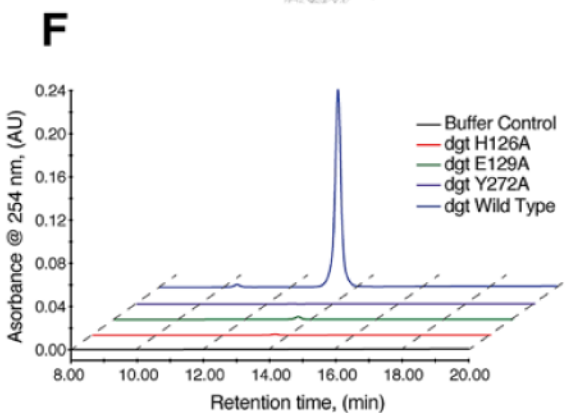

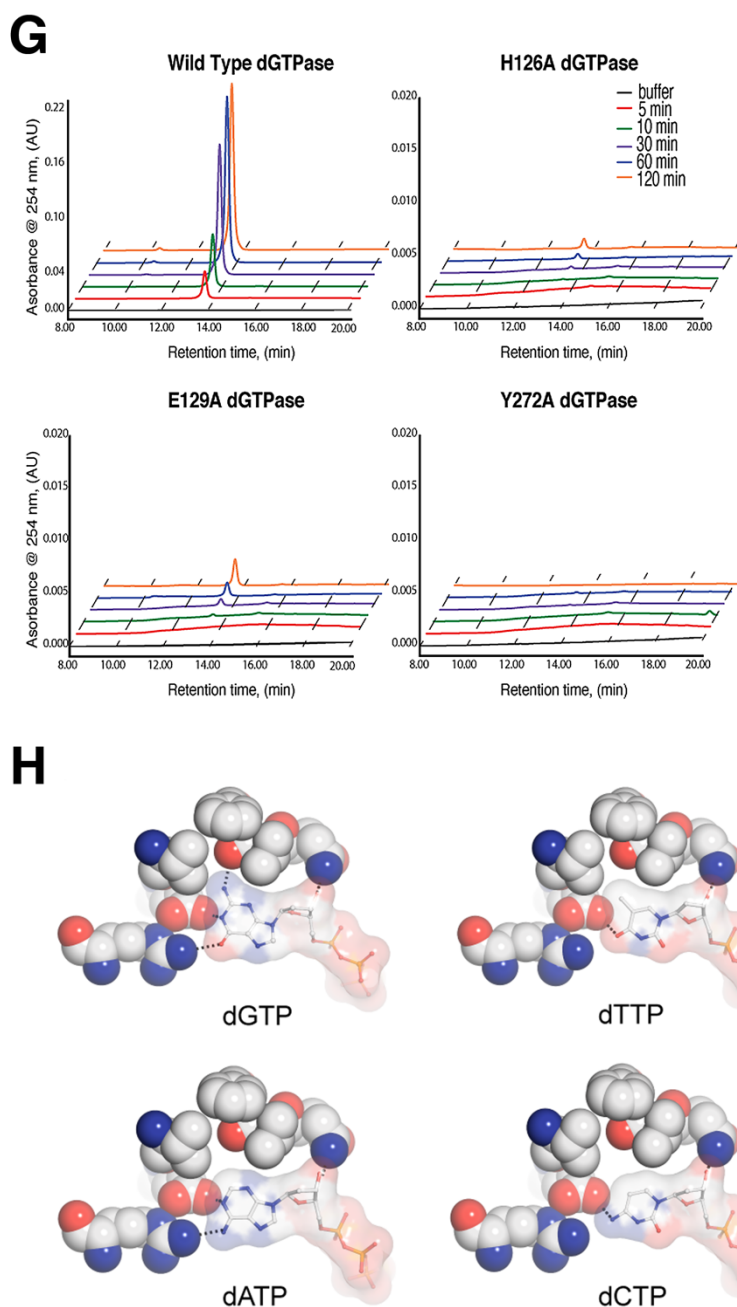

**Figure S3. Nucleotide substrate binding, specificity, and *Ec*-dGTPase activity.** **A)** Fo-Fc map counteracted at  $3\sigma$  showing electron density corresponding to dGTP. The presence of the substrate was observed in every pocket of the hexamer (modeled dGTP shown). **B)** Catalytic activity of *Ec*-dGTPase crystals in the presence of  $100\ \mu\text{M}$  dGTP, illustrating that cross-linked crystals (red line) are still catalytically active when compared to wild-type (black line) or *Ec*-

dGTPase in the presence of 0.5 mM GTP (blue line). **C)** Final refined 2Fo-Fc map countered at  $1.5 \sigma$  after applying negative B-factor sharpening =150. The quality of the map allowed full tracing of the structure. **D)** Final refined  $2F_{obs} - F_{calc}$  map contoured at  $2.0 \sigma$  and ball and stick representation of  $Mn^{2+}$  octahedral coordination by HD residues (forest green), dGTP and a water molecule (W1) are shown as ball and stick model and red sphere respectively.

**E)** Ball and stick representation of residues involved in dGTP-1-thiol binding and final refined  $2F_{obs} - F_{calc}$  map around dGTP-1-thiol contoured at  $1.2\sigma$ . The overall and active site R.M.S.D. between the two substrates bound structures dGTP-1-thiol and dGTP is 0.4 Å and 0.3 Å respectively.

**F)** Enzymatic activity analysis after 2-hour incubation at room temperature in the presence of 100 µM dGTP substrate was performed by monitoring total deoxyguanosine product using reverse-phase chromatography for wild-type (blue), Y272A (purple), E129A (green) and H126A (red) dGTPase enzymes. The representative chromatogram indicates that the activity of dGTPase mutants is significantly decreased when compared to wild-type enzyme.

**G)** Enzymatic activity of individual dGTPase constructs. Representative reverse-phase HPLC chromatograms illustrating the amount of deoxyguanosine (dG) product attained after 5 (red), 10 (green), 30 (purple), 60 (blue), and 120 (orange) minutes of incubation at room temperature in the presence of 100 µM dGTP for wild-type, H126A mutant, E129A mutant, and Y272A mutant constructs. Wild-type enzyme is capable of producing an order of magnitude more dG product after 5 minutes (red line) than the mutant constructs after 120 minutes incubation (orange lines).

**H)** Comparison of dGTP with models of dTTP, dATP and dCTP binding to illustrate that active site residues can form four hydrogen bonds with the amide and ketone groups of dGTP but not with the other NTPs where one interaction is observed at best.

**Figure S4.**  
**differences**  
**GTP**  
**of *Ec*-**  
**A) Final**  
 $2F_{obs} - F_{calc}$   
 of  
 to the active  
 contoured at  
 applying  
 factor

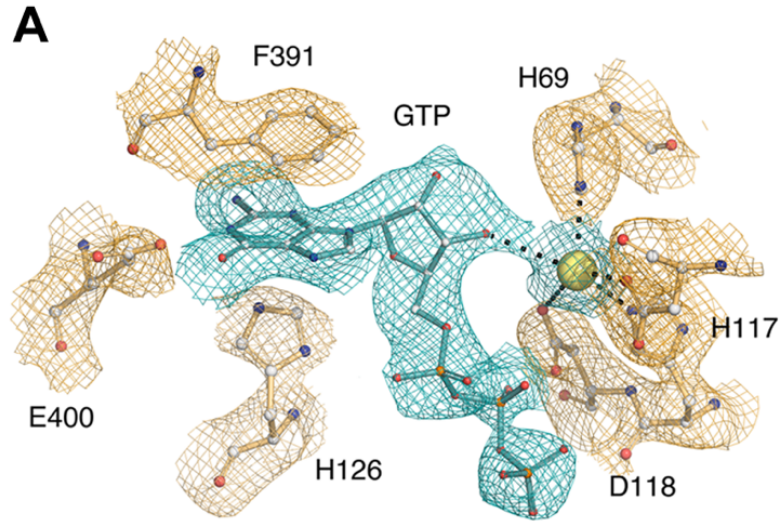

**Structural**  
**related to**  
**inhibition**  
**dGTPase.**  
 refined  
 GTP bound  
 site pocket  
 1.2 $\sigma$  after  
 negative B-

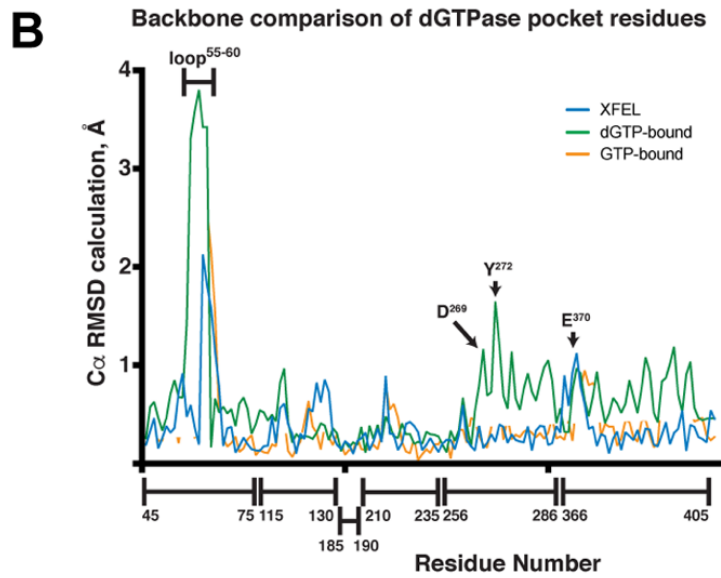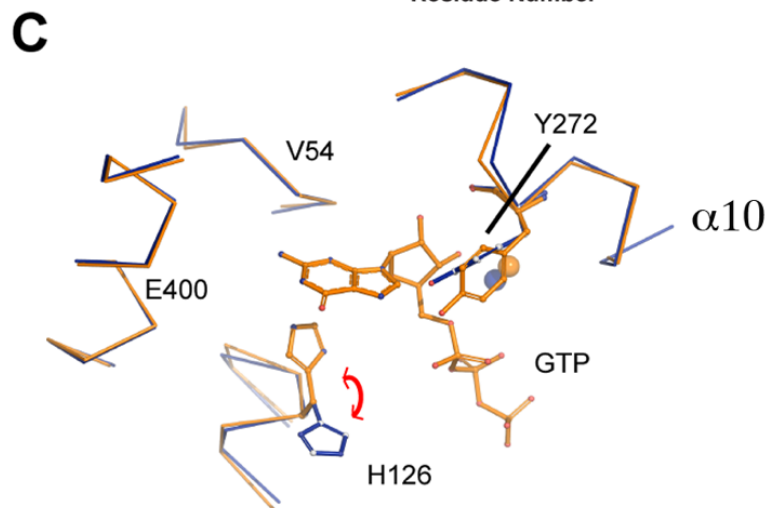

sharpening=160. **B.** Graphical representation of C $\alpha$  RMSD illustrating: 1) the similarities between the apo and GTP structures (orange and blue traces) and 2) the conformational changes of the binding pocket residues triggered by dGTP binding (green trace). Positional differences for C $\alpha$ s of Val<sup>54</sup>, Asp<sup>268</sup>, Tyr<sup>272</sup> and Glu<sup>400</sup>. The position of the catalytic His<sup>126</sup> varies among the three structures illustrating its conformational flexibility. **C)** Overlay between the apo and GTP-bound structures showing the similar conformations between the two of them.

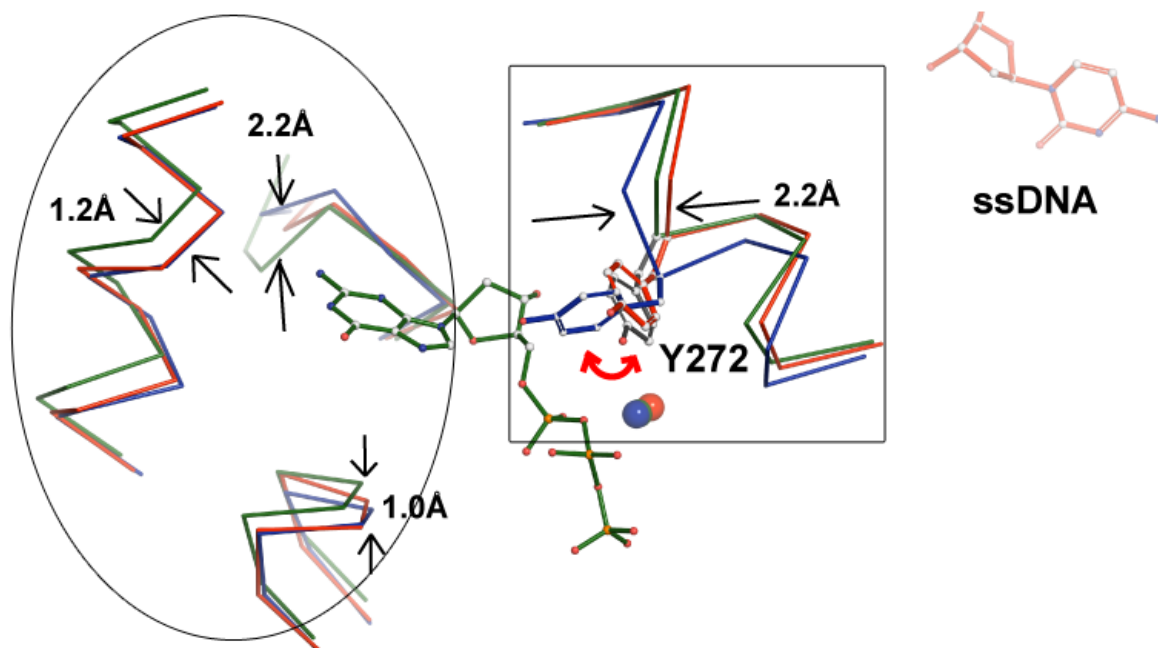

**Figure S5.** Overlay between *Ec*-dGTPase apo-structure bound to ssDNA (PDB 4X9E, red wire and red ball and stick model) with the apo-XFEL (blue wire) and the dGTP-bound structures (forest green wire). The ssDNA structure combines apo-like (overlapped red and blue traces, left ellipse) and substrate-bound like (overlapped green and red traces, right square) features. These conformational changes lead to a 20% increase in the size of the substrate binding pocket. The RMSD for C $\alpha$ s between the structures is indicated between arrows.

## Supplemental Tables

**Table S1. Example of crystal coordinates and fiducial marks derived from ImageJ for MCH represented in Figure 1.**

| <i>Fiducial Coordinates</i> | <i>X-Coordinate</i> | <i>Y-Coordinate</i> | <i>Angular Offset<sup>a</sup></i> |
|-----------------------------|---------------------|---------------------|-----------------------------------|
| Position 1                  | 844                 | 36                  | 0                                 |
| Position 2                  | 1430                | 690                 | 0                                 |
| Position 3                  | 794                 | 1258                | 0                                 |
| Position 4                  | 240                 | 644                 | 0                                 |

  

| <i>Crystal Coordinates</i> | <i>X-Coordinate</i> | <i>Y-Coordinate</i> | <i>Angular Offset</i> |
|----------------------------|---------------------|---------------------|-----------------------|
| Crystal 1                  | 672.8               | 217.9               | 0                     |
| Crystal 2                  | 1045.2              | 258.0               | 0                     |
| Crystal 3                  | 910.4               | 259.7               | 0                     |
| Crystal 4                  | 397.9               | 310.3               | 0                     |
| Crystal 5                  | 965.8               | 322.4               | 0                     |
| Crystal 6                  | 616.2               | 342.1               | 0                     |
| Crystal 7                  | 638.1               | 379.0               | 0                     |
| Crystal 8                  | 1078.2              | 383.8               | 0                     |
| Crystal 9                  | 747.7               | 413.5               | 0                     |
| Crystal 10                 | 939.3               | 426.6               | 0                     |
| Crystal 11                 | 1207.8              | 438.5               | 0                     |
| Crystal 12                 | 298.2               | 438.0               | 0                     |
| Crystal 13                 | 534.2               | 453.5               | 0                     |
| Crystal 14                 | 328.4               | 480.2               | 0                     |
| Crystal 15                 | 804.5               | 516.6               | 0                     |
| Crystal 16                 | 761.4               | 531.3               | 0                     |
| Crystal 17                 | 215.7               | 529.6               | 0                     |
| Crystal 18                 | 652.6               | 560.7               | 0                     |
| Crystal 19                 | 384.0               | 559.1               | 0                     |
| Crystal 20                 | 977.7               | 607.3               | 0                     |
| Crystal 21                 | 506.4               | 624.8               | 0                     |
| Crystal 22                 | 360.8               | 621.6               | 0                     |
| Crystal 23                 | 817.9               | 642.7               | 0                     |
| Crystal 24                 | 324.7               | 710.5               | 0                     |
| Crystal 25                 | 452.9               | 731.0               | 0                     |
| Crystal 26                 | 1046.7              | 759.6               | 0                     |
| Crystal 27                 | 841.8               | 746.8               | 0                     |
| Crystal 28                 | 250.9               | 784.2               | 0                     |
| Crystal 29                 | 696.7               | 816.8               | 0                     |
| Crystal 30                 | 1226.5              | 812.9               | 0                     |
| Crystal 31                 | 922.8               | 839.8               | 0                     |
| Crystal 32                 | 411.3               | 862.5               | 0                     |
| Crystal 33                 | 589.0               | 893.2               | 0                     |
| Crystal 34                 | 1113.9              | 911.4               | 0                     |

<sup>a</sup>For crystals capable of multiple exposures, and angular offset can be input to improve data completeness.

**Table S2. XFEL data collection statistics and efficiency using MCHs**

|                                              | <i>dGTPase</i><br>(LCLS - XPP)   | <i>Pol II – TFIIIB - DNA</i><br>(LCLS - XPP)  | <i>Pol II – Spt4/5 – DNA</i><br>(LCLS - XPP)  |
|----------------------------------------------|----------------------------------|-----------------------------------------------|-----------------------------------------------|
| <b><u>Experimental Parameters</u></b>        |                                  |                                               |                                               |
| Average Crystal Size ( <i>a x b</i> ,<br>μm) | 80 x 80                          | 100 x 150                                     | 40 x 70                                       |
| Total Number of Images                       | 335                              | 613                                           | 807                                           |
| Total Hits (% of total<br>images)            | 302 (90.1)                       | 523 (85.3)                                    | 643 (79.7)                                    |
| Indexed/Merged (% of total<br>images)        | 221 (65.9)                       | 421 (68.7)                                    | 594 (73.6)                                    |
| <b><u>Data Collection Statistics</u></b>     |                                  |                                               |                                               |
| Space Group                                  | P4 <sub>3</sub> 2 <sub>1</sub> 2 | P2 <sub>1</sub> 2 <sub>1</sub> 2 <sub>1</sub> | P2 <sub>1</sub> 2 <sub>1</sub> 2 <sub>1</sub> |
| Resolution (Å)                               | 25-3.2                           | 25-3.5                                        | 25-4.2                                        |
| Completeness (%)                             | 97.9 (91.3)                      | 91.3 (67.5)                                   | 95.8 (78.2)                                   |
| Redundancy                                   | 7.3 (3.3)                        | 7.8 (5.4)                                     | 9.3 (6.1)                                     |
| <I/σI>                                       | 6.1 (0.8)                        | 5.7 (0.4)                                     | 4.8 (0.3)                                     |
| R <sub>split</sub> (%)                       | 37.3 (85.2)                      | 36.9 (102)                                    | 34.9 (88)                                     |
| Data Processing<br>Program                   | cctbx.xfel                       | cctbx.xfel                                    | cctbx.xfel                                    |



**Table S3. Crystallographic data collection and refinement statistics**

| PDB ID code                               | <i>dGTPase - SeMet</i><br>(APS-GM/CA)<br><i>Inflection</i> | <i>dGTPase - XFEL</i><br>(LCLS - XPP) | <i>dGTPase-dGTP-l-thiol</i><br>(APS-GM/CA) | <i>dGTPase - GTP</i><br>(SSRL 12-2) | <i>dGTPase - dGTP</i><br>(SSRL 12-2) |
|-------------------------------------------|------------------------------------------------------------|---------------------------------------|--------------------------------------------|-------------------------------------|--------------------------------------|
|                                           | <b>6O17</b>                                                | <b>6O1V</b>                           | <b>6O1W</b>                                | <b>6O1X</b>                         | <b>6O1Y</b>                          |
| <b><i>Data Collection<sup>a</sup></i></b> |                                                            |                                       |                                            |                                     |                                      |
| Space Group                               | P4 <sub>3</sub> 2 <sub>1</sub> 2                           | P4 <sub>3</sub> 2 <sub>1</sub> 2      | P4 <sub>3</sub> 2 <sub>1</sub> 2           | P4 <sub>3</sub> 2 <sub>1</sub> 2    | P4 <sub>3</sub> 2 <sub>1</sub> 2     |
| Unit cell (Å)                             | 191.9, 191.9, 286.9                                        | 192.3, 192.3, 291.0                   | 191.2, 191.2, 298.6                        | 191.6, 191.6, 292.9                 | 192.2, 192.2, 299.6                  |
| $\alpha, \beta, \gamma$ (°)               | 90, 90, 90                                                 | 90, 90, 90                            | 90, 90, 90                                 | 90, 90, 90                          | 90, 90, 90                           |
| Wavelength (Å)                            | 0.968                                                      | 1.304                                 | 1.0332                                     | 0.9798                              | 0.9798                               |
| Resolution (Å) <sup>b</sup>               | 49-2.85                                                    | 25-3.2                                | 49-3.35                                    | 40-3.25                             | 40.3.28                              |
| Unique Reflections                        | 124,944                                                    | 88,170                                | 80,111                                     | 81,683                              | 85,095                               |
| Completeness (%)                          | 100 (100)                                                  | 97.9 (91.3)                           | 100 (100)                                  | 94.8 (86.3)                         | 99.0 (98)                            |
| Redundancy                                | 15.7 (15.5)                                                | 7.3 (3.3)                             | 9.3 (9.1)                                  | 6.4 (2.2)                           | 8.7 (2.5)                            |
| CC <sub>1/2</sub> (%)                     | 99.4 (33.0)                                                | 82.8 (25.5)                           | 99.0 (28.9)                                | 99.8 (60.1)                         | 94.9 (45)                            |
| $\langle I/\sigma I \rangle$              | 15.7 (1.0)                                                 | 6.1 (0.8)                             | 4.7 (0.9)                                  | 5.5 (0.7)                           | 7.1 (1.2)                            |
| Mosaicity (°)                             | 0.12                                                       | 0.5                                   | 0.2                                        | 0.35                                | 0.3                                  |
| R <sub>merge</sub> (%)                    | 27.7 (308)                                                 | 64.7 (84.5)                           | 29.9 (248)                                 | 33.7 (302)                          | 25.2 (79)                            |
| R <sub>pim</sub> (%)                      | 7.5 (83.2)                                                 | 37.3 (85.2) <sup>c</sup>              | 10.2 (86.5)                                | 12.2 (94.1)                         | 6.1 (75.6)                           |
| Data Processing Program                   | HKL2000                                                    | cctbx.xfel <sup>d</sup>               | XDS/Scala                                  | XDS/Scala                           | HKL2000                              |
| <b><i>Refinement</i></b>                  |                                                            |                                       |                                            |                                     |                                      |
| No. Atoms                                 | 27,701                                                     | 27,352                                | 25,059                                     | 25,047                              | 26,560                               |
| R <sub>cryst</sub> /R <sub>free</sub> (%) | 17.6/20.6                                                  | 23.2/24.5                             | 17.9/21.2                                  | 18.3/21.5                           | 20.5/24.1                            |
| Ramachadran plot                          |                                                            |                                       |                                            |                                     |                                      |
| Outliers                                  | 1.4                                                        | 1.4                                   | 2.1                                        | 1.5                                 | 2                                    |
| Allowed                                   | 4.6                                                        | 6.6                                   | 6.9                                        | 4.5                                 | 5                                    |
| Favored                                   | 94                                                         | 92                                    | 91                                         | 94                                  | 93                                   |
| r.m.s deviations                          |                                                            |                                       |                                            |                                     |                                      |
| Bond Length (Å)                           | 0.007                                                      | 0.01                                  | 0.02                                       | 0.02                                | 0.013                                |
| Overall B (Å <sup>2</sup> )               | 95                                                         | 112                                   | 135                                        | 123                                 | 117                                  |
| Refinement Program                        | Buster                                                     | Buster                                | Buster                                     | Buster                              | Buster                               |

<sup>a</sup>Numbers in parentheses correspond to the highest resolution shell<sup>b</sup>Resolution limits were extended to include weak intensity data.

**Table S4. Structural overall and active site comparison R.M.S.D (Å) statistics**

| <b>Overall</b>       | dGTPase - XFEL | dGTPase-dGTP | dGTPase-dGTP-1-thiol | dGTPase - GTP |
|----------------------|----------------|--------------|----------------------|---------------|
| dGTPase - XFEL       | X              | 0.80         | 0.83                 | 0.50          |
| dGTPase-dGTP         |                | X            | 0.30                 | 0.83          |
| dGTPase-dGTP-1-thiol |                |              | X                    | 0.85          |
| dGTPase - GTP        |                |              |                      | X             |

| <b>Active site</b>   | dGTPase - XFEL | dGTPase-dGTP | dGTPase-dGTP-1-thiol | dGTPase - GTP |
|----------------------|----------------|--------------|----------------------|---------------|
| dGTPase - XFEL       | X              | 0.68         | 0.72                 | 0.45          |
| dGTPase-dGTP         |                | X            | 0.40                 | 0.70          |
| dGTPase-dGTP-1-thiol |                |              | X                    | 0.70          |
| dGTPase - GTP        |                |              |                      | X             |
